# **Modeling effects of crop production, energy development and conservation-grassland loss on avian habitat**

## **Short title: Modeling grassland-bird habitat**

**Jill A. Shaffer<sup>1,\*</sup>, Cali L. Roth<sup>2</sup>, David M. Mushet<sup>1</sup>**

<sup>1</sup>United States Geological Survey, Northern Prairie Wildlife Research Center, Jamestown, North Dakota,  
United States of America

<sup>2</sup>United States Geological Survey, Dixon Field Station, Dixon, California, United States of America

\*Corresponding author

Email: [jshaffer@usgs.gov](mailto:jshaffer@usgs.gov)

This manuscript was withdrawn in compliance with USGS Fundamental Science Practices policy, which prohibits public release of pre-decisional manuscripts.
